# Spread of pathological tau proteins through communicating neurons in human Alzheimer's disease

Jacob W. Vogel<sup>a,\*</sup>, Yasser Iturria-Medina<sup>a</sup>, Olof T. Strandberg<sup>b</sup>, Ruben Smith<sup>b</sup>, Alan C. Evans<sup>a,\*\*</sup>, Oskar Hansson<sup>b,c,\*\*</sup>, for the Alzheimer's Disease Neuroimaging Initiative, and the Swedish BioFinder Study

<sup>a</sup>*Montreal Neurological Institute, McGill University, Montréal, QC, Canada*

<sup>b</sup>*Clinical Memory Research Unit, Lund University, Lund, Sweden*

<sup>c</sup>*Memory Clinic, Skne University Hospital, Lund, Sweden*

---

## Abstract

Tau is one of the two pathological hallmarks of Alzheimer's disease, and bears a much closer relationship to local neurodegeneration and cognitive impairment than the other hallmark,  $\beta$ -amyloid. Cell and rodent models have shown evidence that tau spreads from cell to cell through anatomical neuronal connections, and that this process is facilitated by the presence of  $\beta$ -amyloid. We test this hypothesis in humans by using an epidemic spreading model (ESM) to simulate the spread of tau over human neuronal connections, and we compare the simulated pattern of progression to the observed pattern measured in the brains of 312 individuals on the Alzheimer's disease spectrum, using PET. Fitting our model, we found that the majority of variance in the overall pattern of tau progression could be explained by diffusion of an agent through the human connectome, measured using either functional connectivity or diffusion tractography. These models far exceeded chance, and outperformed models testing the extracellular spread of tau over Euclidian space. Surprisingly, the ESM predicted the spatial patterns of tau

---

\*Corresponding authors: [jacob.vogel@mail.mcgill.ca](mailto:jacob.vogel@mail.mcgill.ca), [alan.evans@mcgill.ca](mailto:alan.evans@mcgill.ca)

\*\*These authors contributed equally to the work

Data used in preparation of this article were obtained from the Alzheimer's Disease Neuroimaging Initiative (ADNI) database ([adni.loni.usc.edu](http://adni.loni.usc.edu)). As such, the investigators within the ADNI contributed to the design and implementation of ADNI and/or provided data but did not participate in analysis or writing of this report. A complete listing of ADNI investigators can be found at: <http://adni.loni.usc.edu/wp-content/uploads/howtoapply/ADNIAcknowledgementList.pdf>

irrespective of whether subjects demonstrated evidence for brain  $\beta$ -amyloid. In addition, in  $\beta$ -amyloid-positive subjects only, regions with greater amyloid burden showed greater tau than predicted by connectivity patterns, suggesting a role of amyloid in accelerating the spread of tau in certain isocortical regions. Altogether, our results provide strong evidence that tau spreads through neuronal communication pathways even in normal aging, and that this process is accelerated by the presence of brain  $\beta$ -amyloid.

*Keywords:* tau, PET, diffusion models, connectivity, alzheimer's disease, brain networks

---

Number of pages: 26

Number of Figures: 6

Number of Tables: 1

Abstract word count: 241

Introduction word count: 648

Discussion word count: 1491

### **Conflicts of Interest**

OH has acquired research support (for the institution) from Roche, GE Healthcare, Biogen, AVID Radiopharmaceuticals, Fujirebio, and Euroimmun. In the past 2 years, he has received consultancy/speaker fees (paid to the institution) from Biogen, Roche, and Fujirebio.

### **Acknowledgments**

We would like to thank Bratislav Mistic, Pierre Bellec, and Mallar Chakravarty for comments and suggestions during the formulation of this work, and and Liza Levitis for proofreading the manuscript. JWV is supported by government of Canada through the tri-council Vanier Canada Graduate Doctoral Fellowship. We would also like to acknowledge support from the Ludmer Centre for Neuroinformatics and Mental Health and the Healthy Brains for Healthy Lives initiative. Work at the authors research center was supported by the European Research Council, the Swedish Research Council, the Knut and Alice Wallenberg foundation, the Marianne and Marcus Wallenberg foundation, the Strategic Research Area MultiPark (Multidisciplinary Research in Parkinsons disease) at Lund University, the Swedish Alzheimer Foundation, the Swedish Brain Foundation, The Parkinson foundation of Sweden, The Parkinson Research Foundation, the Skne University Hospi-

tal Foundation, and the Swedish federal government under the ALF agreement. Doses of <sup>18</sup>F-flutemetamol injection were sponsored by GE Healthcare. The precursor of <sup>18</sup>F-flortaucipir was provided by AVID radiopharmaceuticals. Data collection and sharing for this project was funded by the Alzheimer's Disease Neuroimaging Initiative (ADNI) (National Institutes of Health Grant U01 AG024904) and DOD ADNI (Department of Defense award number W81XWH-12-2-0012). ADNI is funded by the National Institute on Aging, the National Institute of Biomedical Imaging and Bioengineering, and through generous contributions from the following: AbbVie, Alzheimer's Association; Alzheimer's Drug Discovery Foundation; Araclon Biotech; BioClinica, Inc.; Biogen; Bristol-Myers Squibb Company; CereSpir, Inc.; Cogstate; Eisai Inc.; Elan Pharmaceuticals, Inc.; Eli Lilly and Company; EuroImmun; F. Hoffmann-La Roche Ltd and its affiliated company Genentech, Inc.; Fujirebio; GE Healthcare; IXICO Ltd.; Janssen Alzheimer Immunotherapy Research & Development, LLC.; Johnson & Johnson Pharmaceutical Research & Development LLC.; Lumosity; Lundbeck; Merck & Co., Inc.; Meso Scale Diagnostics, LLC.; NeuroRx Research; Neurotrack Technologies; Novartis Pharmaceuticals Corporation; Pfizer Inc.; Piramal Imaging; Servier; Takeda Pharmaceutical Company; and Transition Therapeutics. The Canadian Institutes of Health Research is providing funds to support ADNI clinical sites in Canada. Private sector contributions are facilitated by the Foundation for the National Institutes of Health ([www.fnih.org](http://www.fnih.org)). The grantee organization is the Northern California Institute for Research and Education, and the study is coordinated by the Alzheimer's Therapeutic Research Institute at the University of Southern California. ADNI data are disseminated by the Laboratory for Neuro Imaging at the University of Southern California.

## 1. Introduction

Alzheimer's disease is characterized by the presence of  $\beta$ -amyloid plaques and neurofibrillary tangles of hyper-phosphorylated tau at autopsy. Both of these pathological phenomena can now be quantified spatially in the brains of living humans using positron emission tomography (PET), allowing for the study of disease progression before death and, indeed, before symptoms manifest [1].  $\beta$ -amyloid plaques are detectable in the brain many years or even decades before dementia onset [2], but appear to have only subtle effects on cognition and brain health in humans [3, 4, 5, 6], if any. In contrast, tau neurofibrillary tangles are strongly correlated with local neurodegeneration and, in turn, cognitive impairment [7, 8]. However, tau tangle aggregation in the medial temporal lobes is a common and fairly innocuous feature of normal aging [9, 10, 11]. Frank cognitive impairment often coincides with the spreading of tau tangles out of the medial temporal lobes and into the surrounding isocortex, a process that animal models have suggested may be potentiated or accelerated by the presence of  $\beta$ -amyloid plaques [12, 13].

Due to its close link with neurodegeneration and cognitive impairment, tau has received special attention as a potential therapeutic target for Alzheimer's disease [14]. Perhaps the most compelling features of tau pathophysiology are its rather focal distribution of aggregation and its highly stereotyped pattern of progression through the brain. Specifically, neurofibrillary tangles first appear in the transentorhinal cortex, before spreading to the anterior hippocampus, followed by adjacent limbic and temporal cortex, association isocortex, and finally to primary sensory cortex [15, 10, 16, 17]. This very particular pattern has led many to speculate that pathological tau itself, or a pathological process that incurs tau hyper-phosphorylation and toxicity, may spread directly from cell to cell through anatomical connections [18, 19]. Strong evidence in support of this hypothesis has come from animal models, which have repeatedly demonstrated that human tau injected into the brains of  $\beta$ -amyloid expressing transgenic rodents leads to the aggregation of tau in brain regions anatomically connected to the injection site [20, 21, 22, 23, 12]. An important caveat to the aforementioned studies is that they involve injection of tau aggregates that greatly exceed the amount of tau produced naturally in the human brain. In addition, the studies were performed in animals that do not get Alzheimer's disease naturally.

Unfortunately, there are many obstacles to studying the tau-spreading hypothesis in humans. While autopsy studies have provided evidence for tau

38 spreading [24, 25], this evidence comes in the form of limited snapshots in  
39 deceased individuals. Tau-PET allows for the quantification of tau *in vivo*,  
40 but the PET signal is contaminated by off-target binding that limit interpre-  
41 tations [26, 27, 28, 29]. Despite this limitation, circumstantial evidence has  
42 emerged supporting the hypothesis that tau spreads through connected neu-  
43 rons in humans. Studies decomposing the spatial distribution of tau-PET  
44 signal in the human brain have revealed spatial patterns highly reminis-  
45 cent of brain functional networks [30, 31]. In addition, brain regions with  
46 greater functional connections to the rest of the brain tend to have greater  
47 tau accumulation [32], and correlations have been found between functional  
48 connectivity patterns and tau covariance patterns [33, 34].

49 Despite mounting evidence linking brain connectivity and tau expression,  
50 the aforementioned studies mostly involve either comparisons between coarse  
51 whole-brain measures of tau and brain connectivity, or are limited to only  
52 a fraction of brain connections. The initial seeding of tau in the cortex is  
53 thought to lead subsequently to secondary seeding events that cascade sys-  
54 tematically through the cerebral cortex. Therefore, it is paramount that  
55 studies assessing the spread of tau through the brain can effectively model  
56 the complex spatio-temporal dynamics of this process. Therefore, we test the  
57 tau-spreading hypothesis by placing a "tau seed" in the entorhinal cortex,  
58 simulating its diffusion through measured functional and anatomical connec-  
59 tions, and comparing the simulated pattern of global tau spread with actual  
60 pattern derived from tau-PET scans of 312 individuals. This method allows  
61 for a cascade of secondary tau seeding events to occur along a network over  
62 time, more closely simulating proposed models of tau spread in the brain. We  
63 then examine how the behavior of our model interacts with brain  $\beta$ -amyloid.

## 64 2. Materials and Methods

### 65 2.1. Participants

66 Participants of this study represented a selection of individuals from two  
67 large multi-center studies: the Swedish BioFinder Study (BioF; <http://biofinder.se/>)  
68 and the Alzheimer's Disease Neuroimaging Initiative (ADNI; [adni.loni.usc.edu](http://adni.loni.usc.edu)).  
69 Both studies were designed to accelerate the discovery of biomarkers indi-  
70 cating progression of Alzheimer's disease pathology. Participants were se-  
71 lected based on the following inclusion criteria: participants must i) have an  
72 AV1451-PET scan, ii) have either a  $\beta$ -amyloid-PET scan (for ADNI: [ $^{18}\text{F}$ ]-  
73 Florbetapir, for BioF: [ $^{18}\text{F}$ ]-Flutemetamol) or lumbar puncture measuring

Table 1: Demographic information.

|                           | <b>CN</b>  | <b>MCI</b>  | <b>AD</b>  | <b>Total</b> |
|---------------------------|------------|-------------|------------|--------------|
| <b>n</b>                  | 162        | 89          | 61         | 312          |
| <b>Age (SD)</b>           | 72.0 (6.4) | 70.84 (7.8) | 72.0 (7.9) | 71.7 (7.1)   |
| <b>% Women</b>            | 45.1%      | 64.0%       | 58.6%      | 53.1%        |
| <b>Education (SD)</b>     | 14.8 (3.6) | 15.3 (3.7)  | 12.8 (3.9) | 14.6 (3.8)   |
| <b>% ApoE4</b>            | 41.9%      | 58.4%       | 68.5%      | 51.7%        |
| <b>% Amyloid Positive</b> | 42.6%      | 64.0%       | 100.0%     | 66.2%        |

CN = cognitively normal; MCI = mild cognitive impairment; AD =

Alzheimer’s disease dementia, SD = Standard Deviation

74 CSF  $\beta$ -amyloid1-42. In addition, participants were required to be cog-  
75 natively unimpaired, have a clinical diagnosis of mild cognitive impairment, or  
76 have a clinical diagnosis of Alzheimer’s dementia with biomarker evidence  
77 of  $\beta$ -amyloid positivity. For both cohorts separately, PET-based  $\beta$ -amyloid  
78 positivity was defined using a previously described mixture modeling pro-  
79 cedure [5]. For BioFINDER,  $\beta$ -amyloid1-42 positivity was defined as an  
80 (INNOTEST) level below 650ng/L [35]. All participants fitting the inclusion  
81 criteria with AV1451 scans acquired (BioFINDER) or that were available for  
82 public download (ADNI) in May 2018 were included in this study. In total  
83 across both studies, 162 cognitively unimpaired individuals, 89 individuals  
84 with mild cognitive impairment and 61 amyloid-positive individuals with sus-  
85 pected Alzheimers dementia were included. Demographic information can be  
86 found in Table 1.

## 87 2.2. PET Acquisition and Pre-processing

88 MRI and PET acquisition procedures for ADNI (<http://adni.loni.usc.edu/methods/>)  
89 and BioF [36] have both been previously described at length. All AV1451-  
90 PET scans across studies were processed using the same pipeline, which has  
91 also been previously described [36, 31]. Briefly, 5-min frames were recon-  
92 structed from 80-100 minutes post-injection. These frames were re-aligned  
93 using AFNIs 3dvolreg (<https://afni.nimh.nih.gov/>) and averaged, and the  
94 mean image was coregistered to each subject’s native space T1 image. The  
95 coregistered image was intensity normalized using an inferior cerebellar gray  
96 reference region, creating standard uptake value ratios (SUVR).

97 *2.3. Transformation of PET data to regional tau-positive probabilities*

98 Mean regional tau-PET SUVRs were extracted from each individual's  
99 native space PET image using the Desikan-Killiany atlas [37], an 83-region  
100 atlas based on structural morphometry. All cerebellar regions were removed  
101 from the atlas, leaving 78 regions in total. Previous AV1451-PET studies  
102 have noted considerable off-target binding of the AV1451 signal, leading to  
103 signal in regions without pathological tau burden, and likely to pollution  
104 of signal in regions accumulating tau [26, 27, 29, 31]. While many previous  
105 studies have ignored these issues, accounting for off-target binding is essential  
106 to the current study, as our model cannot distinguish off-target from target  
107 signal, and we are not interested in the propagation of off-target signal. To  
108 address this issue, we utilized regional Gaussian mixture modeling under the  
109 assumption that the target and off-target signal across the population are  
110 distinct and separable Gaussian distributions (Fig 1A).

111 As most individuals do not have tau in most regions, pathological signal  
112 should show a skewed distribution across the population, whereas off-target  
113 and non-specific signal should be reasonably normally distributed. Such a  
114 bimodal distribution has been observed for  $\beta$ -amyloid, and mixture modeling  
115 has been used in this context to define global  $\beta$ -amyloid positivity [38, 39].  
116 Our approach differs from these previous studies as we do not assume the dis-  
117 tribution of target and off-target binding to be homogeneous across cortical  
118 areas – we apply Gaussian mixture modeling separately to each region-of-  
119 interest (Fig 1A). Specifically, for each region, we fit a one-component and  
120 a two-component Gaussian mixture model across the entire population. We  
121 compare the fit of the two models using Akaike's information criterion. If a  
122 two-component model fits the data better, this likely indicates the presence  
123 of pathological tau in a proportion of the population, and the Gaussians fit  
124 to the data provide a rough estimate of an SUVR threshold, above which  
125 AV1451 signal has a high probability of being abnormal. If a one-component  
126 model fits better, this indicates the AV1451-PET signal within the region is  
127 roughly normally distributed across the population, which we do not expect  
128 for tau in a population including many cognitively impaired individuals. Re-  
129 gions showing a unimodal distribution are therefore discarded from the ESM  
130 model, as neurofibrillary tau tangles are likely not expressed in that region  
131 within the sample. Furthermore, since the ESM receives regional (tau) prob-  
132 abilities as input, we calculate the probability that a given subject's ROI  
133 SUVR value falls onto the second (i.e. right-most) Gaussian distribution  
134 using repeated five-fold cross-validation. Assuming this second distribution

135 represents the subjects with abnormal AV1451 signal, this value estimates the  
136 proximity of a subject to the pathological distribution. Effectively, this con-  
137 verts regional SUVRs to regional tau-positive probabilities. This approach  
138 defines a fairly conservative, data-driven threshold for SUVR values, above  
139 which, one can assume the presence of abnormal signal (perhaps indicating  
140 pathological tau accumulation) with a high degree of confidence.

#### 141 *2.4. Connectivity measurements*

142 The overall pattern of spread simulated by the Epidemic Spreading Model  
143 (see next section) is determined by the relationship matrix, which represents  
144 pairwise relationships between each region-of-interest. Indeed, this is the sys-  
145 tem through which the simulated signal will diffuse. Varying the relationship  
146 matrix can, for example, allow for the tests of different hypotheses of spread.  
147 We use a functional connectivity matrix generated from a group of young  
148 healthy controls to test the hypothesis that tau spreads through communi-  
149 cating neurons. We validate this procedure using anatomical connectivity  
150 measurements generated from healthy and impaired older adults. Finally,  
151 we test the hypothesis of tau spreading through extra-cellular space by using  
152 a Euclidian distance matrix as input.

153 Functional connectivity measurements were generated from a subsample  
154 of young healthy controls from the COBRE dataset [40], a publicly available  
155 sample which we accessed through the Nilearn python library. All subjects  
156 listed as healthy controls under the age of 40 were selected, totaling 74 in-  
157 dividuals. The images were already preprocessed using the NIAK resting-  
158 state pipeline (<http://niak.simexp-lab.org/pipepreprocessing.html>), and ad-  
159 ditional details can be found elsewhere [40]. Correlation matrices were gen-  
160 erated by finding the correlation between timeseries' of each pair of regions-  
161 of-interest from the Desikan-Killiany atlas, and all available confounds were  
162 regressed from the correlation matrices. We took the mean of all 74 cor-  
163 relation matrices to create an average healthy connectome template. This  
164 connectome was then thresholded so as to only retain the top 10% of con-  
165 nections, and transformed so all values fell between 0 and 1.

166 To validate our findings, we created a template structural connectiv-  
167 ity matrix using DTI tractography data from a non-overlapping sample of  
168 healthy and cognitively impaired individuals from ADNI. In total, 204 indi-  
169 viduals had one or more DTI scans available, for a total of 540 scans. All  
170 scans were preprocessed with a previously described diffusion tractography  
171 pipeline [41], and acquisition and processing information has been described



172 in detail [42]. Briefly, orientation distribution functions (ODF) were calcu-  
173 lated and in turn used to generate deterministic connections between pairs  
174 of brain regions from the Desikan atlas. Specifically, an ACD measure was  
175 used, representing the total proportion of regional surface area (across both  
176 regions) that contain connecting fibers between the two regions. All images  
177 were assessed for quality. Connectomes were averaged across all subjects  
178 resulting in a template structural connectome in aging.

179 To create a Euclidian distance matrix, we calculate the coordinate repre-  
180 senting the center of mass for each region of interest, and found the Euclidian  
181 distance between it and the center of mass of every other ROI. By using this  
182 distance matrix in the epidemic spreading model, we test the hypothesis that  
183 tau diffuses radially across adjacent cortex, rather than through connected  
184 regions.

### 185 *2.5. The Epidemic Spreading Model*

186 The spread of tau through connected brain regions was simulated us-  
187 ing the Epidemic Spreading Model (ESM), a previously described diffusion  
188 model that has been applied to explain the spread of  $\beta$ -amyloid through the  
189 brain [43]. The ESM simulates the diffusion of a signal from an epicenter  
190 through a set of connected regions over time (Fig 1B,C). The dynamics of  
191 the spreading pattern are controlled by the weighted connectivity between  
192 regions, and by a set of parameters fit within-subject, the latter of which are  
193 solved through simulation. Specifically, the parameters represent subject-  
194 specific i) global tau production rate, ii) global tau clearance rate and iii)  
195 age of onset, which interact with regional-connectivity patterns to determine  
196 the velocity of spread. The ESM is simulated over time for each subject  
197 across several parameter sets, and the set that produces the closest approx-  
198 imation to observed tau burden for a given subject is selected. Note that  
199 these parameters themselves do not control regional patterning, which is the  
200 metric by which the accuracy of the model is evaluated (see below). Instead,  
201 the free parameters moderate the overall tau burden (i.e. the stopping point),  
202 which allows the ESM to be fit to individuals across the Alzheimer’s disease  
203 spectrum. For example, an individual with little-to-no tau burden would  
204 likely be fit with a balance of production and clearance rates that would pre-  
205 clude the overproduction and spread of tau signal (Fig 1C). A detailed and  
206 formalized description of the ESM can be found elsewhere [43].

207 In previous applications of the ESM, the model is fit over every possible  
208 epicenter as well as combinations of epicenters, and the epicenter providing

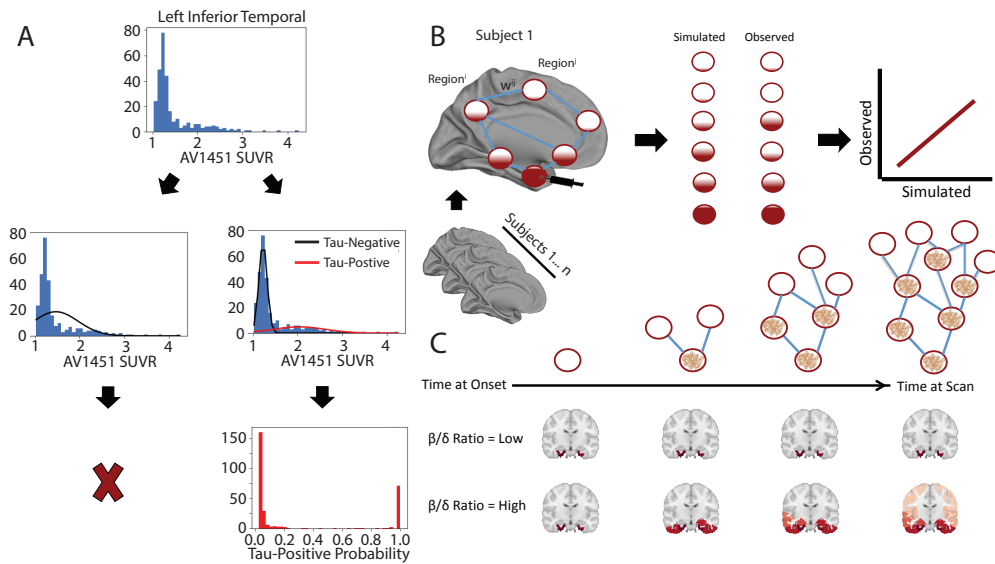

Figure 1: Methodological approaches. A) The distribution of all SUVR values in the left inferior temporal ROI are shown. Two Gaussian mixture models are fit to the data. When a one-component model fits the data better, the ROI is discarded. When a two-component model fits better, the probability that each values falls upon the second distribution is calculated. B) An artificial system based on a pairwise relationship (e.g. functional connectivity) matrix is created, where the relationship between regions  $i$  and  $j$  is represented by weight  $w_{ij}$ . For each subject, a seed is placed at the model epicenter, and the diffusion of this signal over time is simulated through the system, where the inter-regional relationships determine the pattern of spread, and subject-level free parameters determine the velocity of diffusion, until an optimal fit is reached. The simulated tau signal is then compared to the observed tau-PET signal to evaluate the model. C) Advantages of the ESM over traditional approaches includes the initiation of secondary seeding events as the diffusion process reaches new regions (top), and the fitting of subject-level production ( $\beta$ ) and clearance ( $\delta$ ) parameters. A balance in these parameters will lead to little to no spreading over time, while increasing imbalance leads to accelerated spread.

209 the best overall fit to the data is selected. In our case, autopsy work provides  
 210 strong evidence for a consistent "epicenter" of tau neurofibrillary tangles in  
 211 humans. Tangles first emerge in the trans-entorhinal cortex, before emerging  
 212 in other parts of the entorhinal cortex as well as the anterior hippocampus  
 213 [15, 10]. We therefore ran models with the left and right entorhinal cortex  
 214 selected as the model epicenters. However, for the purposes of validation, a  
 215 best-fitting model-derived epicenter was also computed, by fitting the ESM  
 216 across all possible regions and finding the best average within-subject fit.  
 217 Once this epicenter was found, we ran the model once more using both left  
 218 and right regions as the model epicenters.

219 The ESM takes as input a Region x Subject matrix of values ranging  
 220 from 0 to 1, representing the probability of a pathological burden (in this

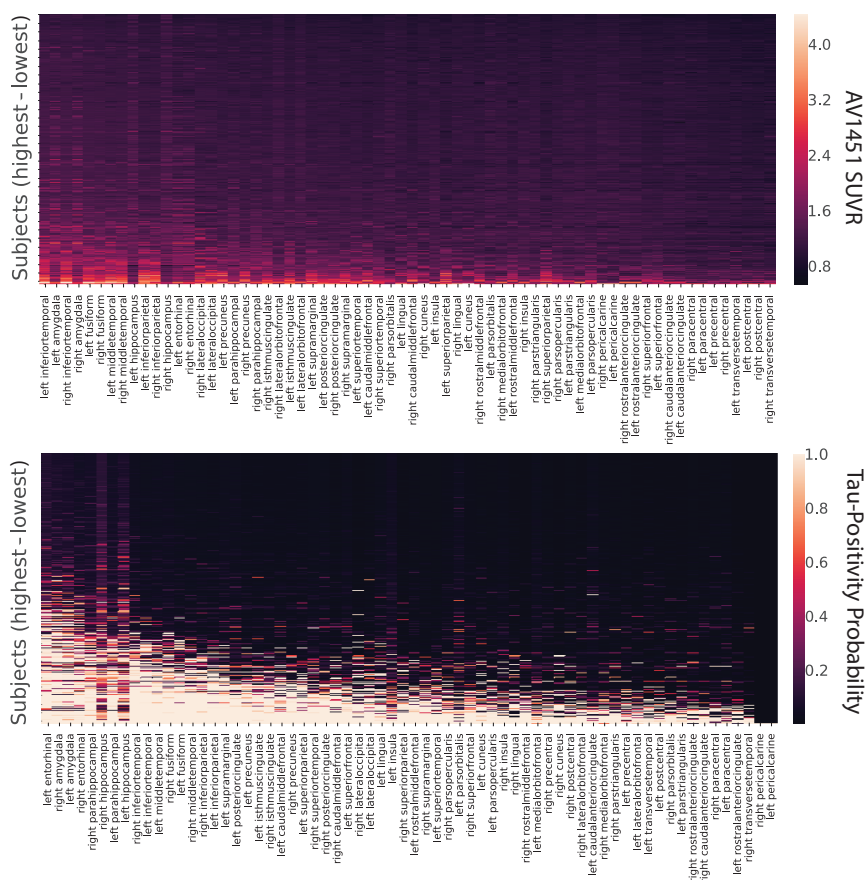

Figure 2: Tau-PET data before and after conversion to tau-positive probabilities. Each row is a subject sorted top-bottom by least to most overall tau. Each column is an ROI, sorted left to right by most to least overall tau. Warmer colors represent higher SUVR values (top) or tau-positive probabilities (bottom). Conversion to tau-positive probabilities creates a sparse distribution of values demonstrating a progression. The order of ROIs resembles those described in the autopsy literature.

221 case, of tau) in a given region for a given subject. The model is fit within-  
 222 subject and, for each subject, produces an estimate of tau probability for  
 223 every region-of-interest.

## 224 2.6. Experimental Design and Statistical Analysis

225 The ESM was fit using different relationship matrices (see above). Each  
 226 model was evaluated by mean within-individual fit, as well as global pop-  
 227 ulation fit. Individual model fit is calculated as the  $r^2$  between predicted  
 228 regional tau probabilities and actual regional tau probabilities measured

229 with AV1451-PET, for each individual. The mean  $r^2$  across all individu-  
230 als was used to represent overall model fit. To evaluate the accuracy of  
231 the global pattern, the regional predicted and observed tau probabilities,  
232 respectively, were averaged across all subjects, and the  $r^2$  between these  
233 group-averaged patterns were calculated. Together, these two accuracy mea-  
234 sures represent the degree to which regional connectivity predicts the spa-  
235 tial pattern of tau-PET measured within and across subjects, respectively.  
236 To ensure the magnitude of our results were greater than chance given a  
237 matrix of similar properties, we fit the ESM using 100 null matrices with  
238 preserved degree and strength distributions using the Brain Connectivity  
239 toolbox (<https://sites.google.com/site/bctnet/>). We use the null distribu-  
240 tion to calculate the mean and 95% confidence intervals of the relationship  
241 occurring by chance. Since we run only 100 null models per test, the lowest  
242 possible p-value is 0.01, which would suggest the observed test value was  
243 higher than all values observed by chance.

244 To examine the global accuracy of the ESM stratified by amyloid status,  
245 we first divided all subjects into one of two diagnostic groups: amyloid-  
246 negative and amyloid-positive. We then calculated the mean of predicted and  
247 observed values across all subjects within each amyloid group, respectively.

248 Studies in rodents have suggested a role of amyloid in facilitating the rapid  
249 fibrillarization of tau oligomers [12]. This would suggest that amyloid may  
250 play a role in explaining tau patterns that is at least partially independent  
251 of connectivity patterns. To explore this, we tested the relationship between  
252 regional modeling error and regional amyloid deposition. Amyloid-PET scans  
253 were available for 307/312 individuals, and were processed identically to tau-  
254 PET scans. We converted regional amyloid SUVR values to amyloid-positive  
255 probabilities using the same regional mixture-modeling approach as described  
256 above. Next, we used the sign of the residual to divide regions into those  
257 that were overestimated by the ESM, and those that were underestimated  
258 by the ESM. An underestimated region, for example, would show more tau  
259 than the model predicted given that region's connectivity to the model epi-  
260 center. We explored the relationship between model estimation and amyloid  
261 by comparing the degree of (group-mean) amyloid between overestimated  
262 and underestimated regions using t-tests. We also observed this relationship  
263 within amyloid-negative and amyloid-positive subjects separately. In this  
264 case, the same (whole sample mean) amyloid measurements were used for  
265 both comparisons, but the regional under/overestimation varied by amyloid  
266 group.

### 267 3. Results

268 AV1451-PET scans measuring tau neurofibrillary tangles *in vivo* were  
269 available for 312 individuals spanning the Alzheimer’s disease spectrum. De-  
270 mographic information for this sample can be found in Table 1.

#### 271 3.1. Conversion to tau-positive probabilities enhances fidelity of tau-PET 272 data

273 We executed a procedure to mitigate off-target binding of AV1451-PET  
274 data using mixture modeling. Regional Gaussian mixture modeling of AV1451  
275 SUVR data across all 312 subjects suggested a two-component (bimodal)  
276 model as a superior fit for all 62 cortical regions-of-interest, as well as the  
277 left and right hippocampi and amygdalae. For all other subcortical regions-  
278 of-interest, a one-component model fit the data better, and these regions were  
279 discarded from all further analyses. The remaining 66 regions were converted  
280 to tau-positive probabilities (Fig 1A) using the Gaussian mixture models.  
281 This threshold-free, data-driven transformation yielded a sparse data matrix  
282 with a clear pattern suggesting a gradual progression of tau across regions  
283 of the brain (Fig 2). When sorted from least to most tau (e.g. [16]), the  
284 regional ordering greatly resembled the previously described progression of  
285 tau pathology [15].

#### 286 3.2. Epidemic spreading of tau over human neuronal connections explains 287 spatial pattern of tau in the brain

288 An epidemic spreading model was fit to the data, simulating the spread of  
289 tau signal from a single epicenter through functional brain connections over  
290 time (Fig 3,4). When using the left and right entorhinal cortex as the model  
291 epicenter, the model explained 59.6% (null model mean  $r^2$  [95% CI] = 0.060  
292 [0.006, 0.126],  $p < 0.01$ ) of the overall spatial pattern of tau (Fig 4A), and on  
293 average, explained 33.6% (SD=20.0%; null model mean  $r^2$  [95% CI] = 0.068  
294 [0.033, 0.147],  $p < 0.01$ ) of the spatial pattern within individual subjects.

295 Next, the ESM was fit allowing the model to select the “best-fitting” re-  
296 gional epicenter (Fig 4A). The hippocampus was selected, slightly improving  
297 the overall global accuracy of the model to 61.6%, but dramatically increasing  
298 the average local (within-subject) explained variance to 47.4% (SD=27.6%).  
299 The epidemic spreading model was particularly effective in predicting the  
300 early progression of tau, but diverged more from the observed tau pattern  
301 over time (Fig 3,4).

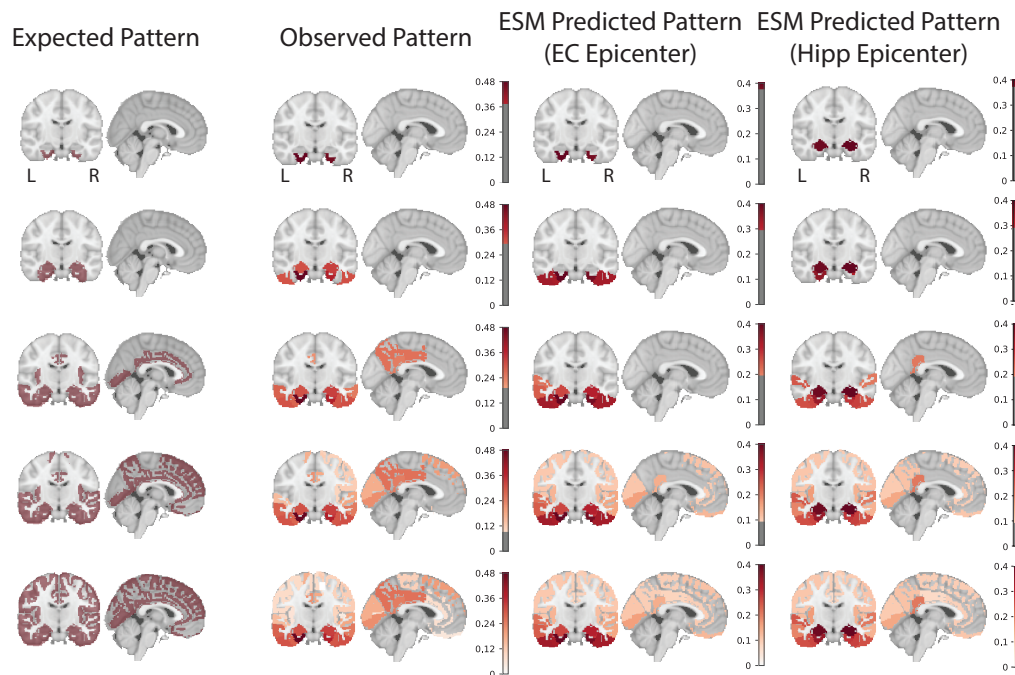

Figure 3: Hypothesized, observed and predicted pattern of tau spreading. (left) Hypothetical spread patterns represented by Braak stages I, II, VI, V and VI as described in [44]. (right) Spreading patterns of (from left to right) the observed tau-PET data, the ESM simulated data with entorhinal epicenter, and with hippocampus epicenter. Warmer colors represent higher proportion of regional tau-positivity predicted or observed across the population. Each "stage" was achieved by arbitrarily thresholding the population-mean tau-positive probability image at the following thresholds: 0.4, 0.3, 0.2, 0.1, 0

302 As a validation, the ESM was fit using a structural connectome created  
 303 using diffusion tensor imaging tractography from a separate sample of healthy  
 304 and cognitively impaired older adults (Fig 4A). The model fit was highly  
 305 consistent with models fit over functional connectomes of younger adults.  
 306 Using a bilateral entorhinal cortex epicenter, the model explained 54.9% (null  
 307 model mean  $r^2$  [95% CI] = 0.062 [0.020, 0.133],  $p < 0.01$ ) of the overall spatial  
 308 pattern of tau progression, and on average, explained 38.0% (SD=22.1%, null  
 309 model mean  $r^2$  [95% CI] = 0.132 [0.108, 0.186],  $p < 0.01$ ) of the within-subject  
 310 variance in tau spatial pattern. Once again, we fit the ESM allowing for a  
 311 data-driven epicenter to be selected, and this time, the entorhinal cortex was  
 312 selected as the best-fitting epicenter.

313 Alternative hypotheses have been proposed suggesting tau may simply

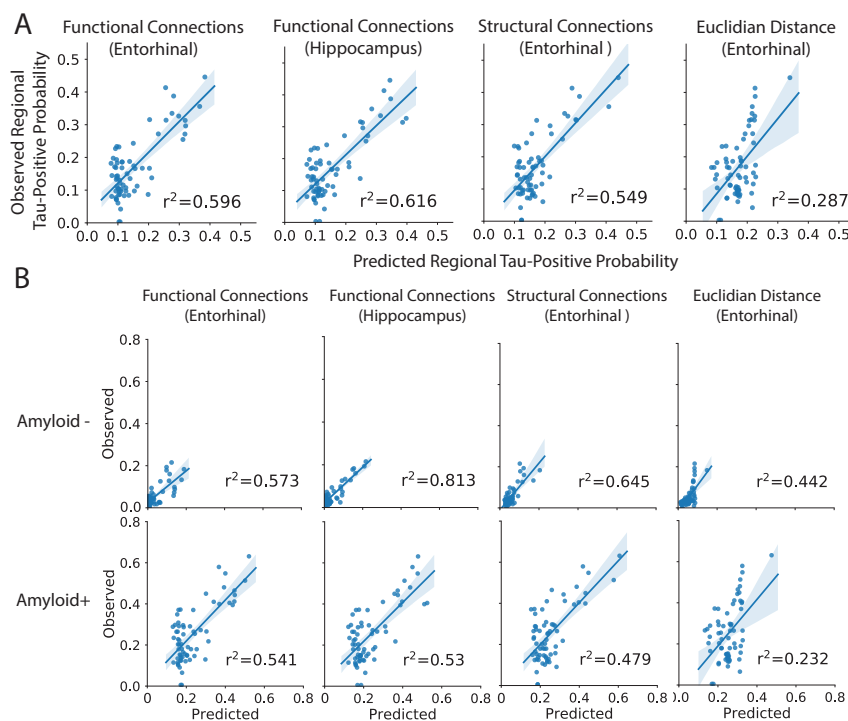

**Figure 4:** Performance of ESM in predicting spatial progression of tau. A) For each plot, each dot represents a region. The x-axis represents the mean simulated tau-positive probabilities across the population, while the y-axis represents the mean observed tau-positive probability. A value of (say) 0.3 for a given ROI would suggest that an average of 30% of all subjects included were predicted (X) or observed (Y) to have positive abnormal tau signal in that region. The results are shown for ESM fit over (from left to right) healthy functional connectome with entorhinal epicenter; healthy functional connectome with a hippocampus epicenter (selected as best-fitting); aging structural connectome with an entorhinal epicenter (also selected as best-fitting); and a Euclidian distance matrix with entorhinal epicenter. B) Breakdown of ESM performance by amyloid status. The average performance of the four different models are shown separately for amyloid-positive and amyloid-negative individuals.

314 spread extracellularly across neighboring regions, rather than through anatom-  
 315 ical connections. To test this hypothesis, a model was fit over a Euclidean  
 316 distance matrix instead of a functional or structural connectome (Fig 4A).  
 317 This model explained considerably less variance, both at the global ( $r^2=0.29$ )  
 318 and individual (mean  $r^2=0.23$ ) level.

### 319 3.3. Low-level tau spreading is evident and predictable in amyloid-negative 320 individuals

321 We divided our study sample into groups based on amyloid status and  
 322 examined model accuracy separately within these groups. Model accuracy

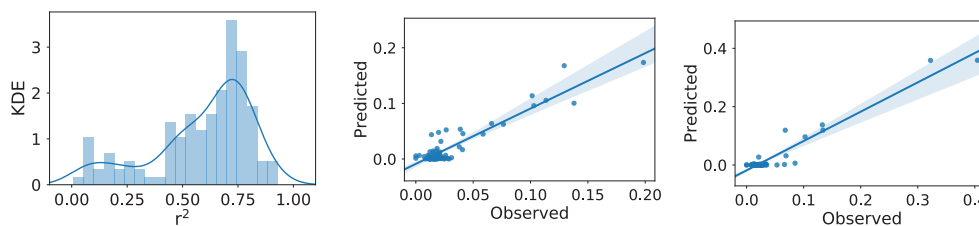

Figure 5: Excellent model performance in CN- individuals. (Left) The distribution of  $r^2$  values representing the range in individual-level model fit across all CN- subjects. Two exemplary subjects are plotted: (middle) a subject with very low tau burden; (right) a subject with low tau burden. Even at very low (subthreshold) levels, the distribution of tau is predicted by functional connectivity patterns.

323 remained high even among amyloid-negative individuals despite a low overall  
324 tau burden (Fig 4B). This was validated by examining model fit against the  
325 tau pattern of individual amyloid-negative subjects (Fig 5). Model perfor-  
326 mance was high across most CN- subjects (Fig 5A), including those with low  
327 (Fig 5C) or even very low (Fig 5B) regional tau burden. In many cases, tau  
328 levels that would otherwise be considered sub-threshold nonetheless demon-  
329 strated a systematic pattern predicted by brain connectivity, particularly  
330 when using a hippocampal epicenter.

### 331 3.4. Regional $\beta$ -Amyloid is associated with region model performance

332 For each model, regions-of-interest were classified as either overestimated  
333 or underestimated by the model based on the sign of the residual (Fig 6A,B).  
334 Underestimated regions are those demonstrating greater tau burden than  
335 would be expected given connectivity to the model epicenter (i.e. observed  
336  $>$  predicted), while overestimated regions demonstrate less tau than would be  
337 expected given their connectivity profile (i.e. predicted  $>$  observed). Com-  
338 pared to overestimated regions, underestimated regions had greater global  
339  $\beta$ -amyloid burden ( $t = 3.72$ ,  $p = 0.0004$ ; Fig 6C,D), suggesting the regional  
340 presence of amyloid may accelerate the spread or expression of tau tangles.  
341 This effect was only present in amyloid+ individuals (Fig 6E).

## 342 4. Discussion

343 Observations in post-mortem human brains [25, 24] and experiments in  
344 animal models [20, 21, 22, 23, 12] have together provided evidence that tau  
345 can be transmitted from cell to cell through neuronal projections. However,  
346 post-mortem studies cannot provide direct evidence of cell-to-cell spread,



347 and while animal models have proven tau can spread through neuronal con-  
348 nections under certain unnatural conditions, they cannot prove that this  
349 phenomenon occurs naturally in humans. Studies searching for evidence of  
350 cell-to-cell transmission of tau in living humans have been limited by small  
351 datasets, simplistic models and issues relating to the quantitative measure-  
352 ment of tau. Here, we used a mixture-modeling approach on a large sample  
353 of humans on the Alzheimer’s disease spectrum to enhance the quantification  
354 of tau signal, and we applied to this data a diffusion model based on theoret-  
355 ical principles of an agent propagating through a network. These simulations  
356 explained a majority of the variance in the global spatial distribution of tau-  
357 PET signal in the brain, and performed nearly equally well in predicting  
358 the distribution of tau-PET signal in individual subjects. A similar model  
359 testing the hypothesis that tau spreads across neighboring brain regions was  
360 less successful at explaining the overall pattern. The models performed best  
361 in amyloid-negative individuals, and also systematically underestimated the  
362 magnitude of tau in regions classically shown to harbor  $\beta$ -amyloid. Together,  
363 these results suggest that tau spreads slowly through the limbic network in  
364 normal aging, and that the presence of  $\beta$ -amyloid leads to acceleration of tau  
365 tangle expression into isocortical regions.

366 Brain networks may be key to the evolution of neurodegenerative dis-  
367 ease [45]. The atrophy patterns of many neurodegenerative dementias have  
368 been shown to resemble resting-state functional brain networks [46, 47], and  
369 network ”hubs” are especially vulnerable to neurodegeneration across brain  
370 disorders [48]. Studies modeling the diffusion of gray matter degeneration  
371 across brain networks have recreated such patterns with impressive accuracy  
372 [47, 49, 50]. However, in many neurodegenerative disorders, brain atrophy is  
373 preceded and perhaps caused by the aggregation of pathological agents. In  
374 Alzheimer’s disease, the presence of tau is closely linked to [7, 8], and likely  
375 precedes [8, 11], gray matter atrophy. However, because gray matter degen-  
376 eration observed in Alzheimer’s dementia may be caused by many sources  
377 other than Alzheimer’s pathology, gray matter degeneration itself cannot be  
378 used as proxy for tau (e.g. [51]). PET studies therefore provide a unique  
379 advantage by measuring pathological proteins more directly, and applying  
380 network diffusion models to PET data has, for example, led to the successful  
381 description of the spatial progression of  $\beta$ -amyloid in Alzheimer’s disease [43].  
382 Our model uses a similar framework to simulate the spread of tau through  
383 the brain and reaches a similar level of success, both within-subject as well  
384 as globally across all subjects. The application of network models to other

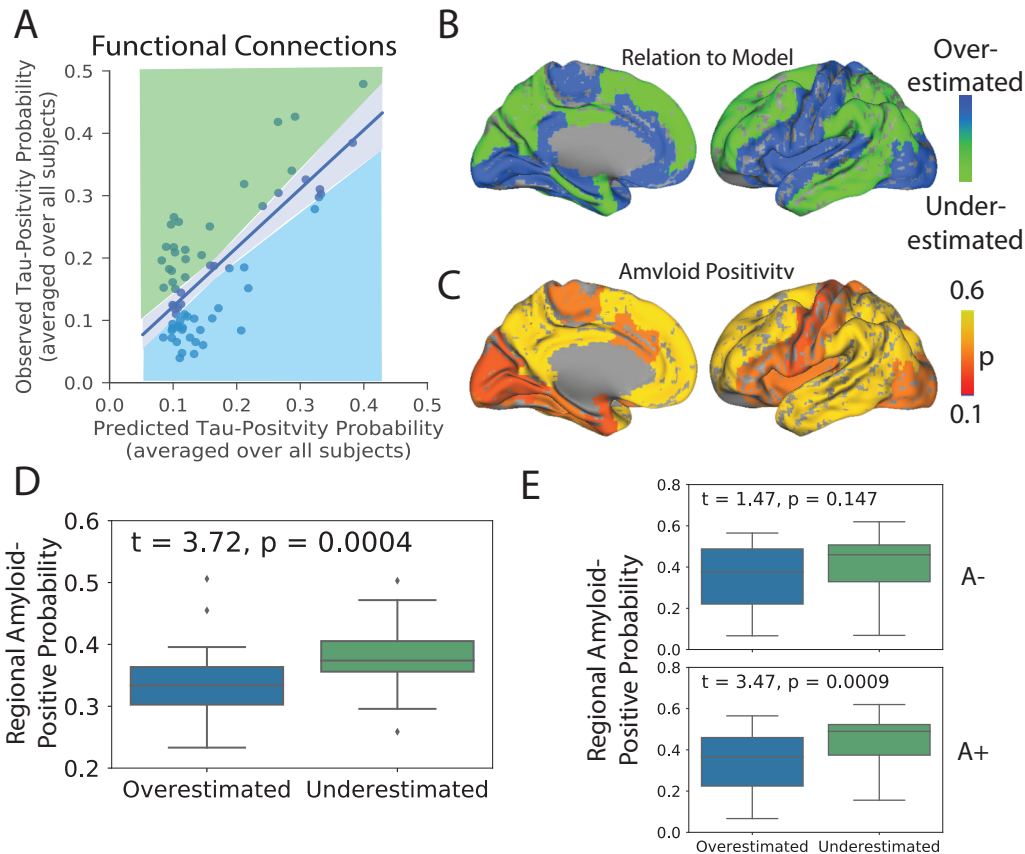

Figure 6: Amyloid explains regional model underestimation. A) Regions were classified as overestimated or underestimated based on the sign of the residual in a comparison of predicted vs. observed values. B) A surface render showing the spatial distribution of over- and underestimated regions. C) A surface render showing the spatial distribution of regional amyloid-positive probabilities averaged over all subjects. D) Underestimated regions tended to have significantly greater amyloid burden, suggesting these regions had more tau than would be predicted given their connectivity to the model epicenter. E) The same relationship stratified by amyloid status. A+ = Amyloid Positive; A- = Amyloid Negative

385 forms of dementia will be needed to conclude whether the spread of patho-  
 386 logical proteins through connected neurons is a common thread linking many  
 387 diseases.

388 While our model recapitulated the early stages of tau spreading accu-  
 389 rately, later stages were modeled less accurately, with a systematic under-  
 390 estimation of tau in regions prone to early and high-volume  $\beta$ -amyloid ag-  
 391 gregation. While tau, not  $\beta$ -amyloid, is closely associated with atrophy in  
 392 Alzheimer's disease, the commonly-observed concurrence of extra-limbic tau

393 and cortical amyloid burden has led to speculation that  $\beta$ -amyloid may ac-  
394 celerate or otherwise facilitate the spread of tau outside the medial temporal  
395 lobe. Recent studies in mice have shown that  $\beta$ -amyloid creates an environ-  
396 ment facilitating the rapid fibrilization of tau [12, 13]. Our data support this  
397 notion, as brain regions harboring more  $\beta$ -amyloid, such as the precuneus and  
398 temporoparietal regions, had a higher incidence of abnormal tau than would  
399 be predicted simply by their regional connectivity to the medial temporal  
400 lobe. Further supporting this conclusion was the observation that this effect  
401 was only seen in amyloid-positive individuals. A conclusive model of tau  
402 spreading may not be complete without incorporating dynamic interaction  
403 with  $\beta$ -amyloid.

404 Tau tangles are a pathological hallmark of AD, but they are neither spe-  
405 cific to AD, nor to neurodegenerative disease in general. The process of aging  
406 appears to lead inevitably to the accumulation of tau tangles in the medial  
407 temporal lobe and occasionally beyond, a phenomenon known as primary  
408 age-related tauopathy (PART) [9], and *in vivo* evidence for the longitudinal  
409 accumulation of tangles in healthy elderly has been observed [11]. While  
410 PART may result in subtle insults to cognition and brain health [52], there  
411 is still debate as to whether PART and AD are distinct processes [53]. We  
412 show that even in individuals without significant amyloid burden and low  
413 (subthreshold) tau-PET signal, the spatial pattern of tau can be predicted  
414 by functional connectivity to medial temporal lobe structures. These findings  
415 suggest that, even in PART, tau likely spreads from cell to cell through com-  
416 municating neurons. The results also suggest closer scrutiny of subthresh-  
417 old tau-PET signal in cognitively unimpaired, amyloid-negative individuals.  
418 Elevated SUVR values occurring in a consistent pattern in specific limbic  
419 regions may be indicative of very low tau pathology, rather than non-specific  
420 or off-target ligand binding.

421 While our findings lend strong support to the hypothesis of tau spreading  
422 through communicating neurons, connectivity patterns and regional amyloid  
423 burden together could not fully explain the observed pattern of tau-PET  
424 across the brain. While a portion of this discrepancy may be explained by  
425 measurement error, there are likely other factors at play. Recent work has  
426 outlined a consistent genomic profile across regions that express tau [54], im-  
427 plicating regional variation in intrinsic molecular environment may mediate  
428 the presence and rate of tau tangle formation. This may explain why, for ex-  
429 ample, many subcortical regions do not show substantial tau burden despite  
430 connections to regions expressing neurofibrillary tau tangles. In addition, it

431 is also possible that only certain neuron types can facilitate the transmission  
432 of tau, which may be challenging to model using macroscopic measures of  
433 functional connectivity. Finally, some studies have suggested the directional  
434 flow of neuronal activity may influence the spread of brain pathology [55].  
435 Future studies incorporating this information, along with dynamics related  
436 to regional amyloid burden and regional vulnerability, may achieve a more  
437 complete model of tau spreading. However, at present, we show that the  
438 spread of tau is predicted by connectivity patterns to a degree that greatly  
439 exceeds both chance and other hypotheses of tau spread, and does so in a  
440 parsimonious fashion, greatly supporting the notion that connectivity is in  
441 some way involved in the spread of tau through the human brain.

442 Tau-PET signal has been notoriously hard to analyze due to extensive  
443 off-target binding reducing signal-to-noise ratio (for review, see [27]). We  
444 partially circumvented this well-known issue by applying Gaussian mixture-  
445 models separately to each region-of-interest. This approach effectively estab-  
446 lished a region-specific baseline representing the normal distribution of off-  
447 target signal, allowing the identification of outliers expressing SUVR values  
448 exceeding the normal expected range. A similar approach has been applied  
449 to the spatial staging of brain amyloid, leading to results that were highly  
450 consistent across samples [38]. However, this approach used a single thresh-  
451 old for all regions, whereas our approach was executed separately across each  
452 region, thereby accounting for regional ligand dynamics. The conversion of  
453 tau-PET SUVR values to tau-positive probabilities resulted in a clean dis-  
454 tribution of values across the brain that greatly resembled the progressive  
455 pattern described in the pathology literature, and validated the expectation  
456 of no substantial burden in the striatum. By both treating each ROI sepa-  
457 rately but also expressing values along a standardized 0-1 probability scale,  
458 we were able to achieve greater regional sensitivity for the detection of both  
459 low-level tau, as well as high confidence tangle aggregation. Importantly,  
460 this approach did not require any arbitrary threshold (e.g. [56]) and resulted  
461 in discreet probability values, and therefore may benefit future studies or  
462 clinical evaluations seeking to classify regions as "tau-positive" with a given  
463 level of confidence.

464 Our study comes with a number of limitations. The premise of testing  
465 the hypothesis of tau spread through communicating neurons requires that  
466 both neuronal connections and tau burden are accurately measured. We  
467 attempt to partially surmount these issues by introducing a data-driven ap-  
468 proach for overcoming off-target and non-specific binding in AV1451-PET

469 data, and by validating our findings over different connectomes across dif-  
470 ferent samples and modalities. Our mixture-modeling strategy is sensitive  
471 to sample size and composition. While it is unlikely that this phenomenon  
472 strongly affected the present findings, it is an important point worth con-  
473 sideration for future studies utilizing this approach to transform tau-PET  
474 data. Another limitation is raised by our choice to remove regions that do  
475 not demonstrate measurable tau burden, namely subcortical regions, from  
476 the model altogether. Certain subnuclei of subcortical structures such as the  
477 thalamus do accumulate tau pathology in Alzheimer’s disease [57], though  
478 we were unable to detect such pathology, perhaps due to the resolution of  
479 our measurements. While it is possible that subcortical structures partici-  
480 pate in neuronal transmission of pathology without expressing the pathology  
481 itself, the current implementation of our model does not support this type  
482 of dynamic. However, while incidental measurement of indirect functional  
483 connectivity is a common critique of functional MRI, here it may pose an  
484 advantage, as functional connectivity mediated by subcortical connections  
485 may still be present in functional connectomes used for this study.

## 486 5. Conclusion

487 Altogether, our data strongly supports the notion that tau pathology it-  
488 self, or information leading to the the expression of pathology, is transmitted  
489 from cell to cell in humans, principally through neuronal connections, and not  
490 extracellular space. Our findings further suggest that this phenomenon pro-  
491 ceeds slowly but perhaps ubiquitously in normal aging, and that the process  
492 is accelerated dramatically in specific brain regions demonstrating  $\beta$ -amyloid  
493 burden. While our *in vivo* results cannot prove that tau spreads through neu-  
494 ronal connections, we show that more highly connected regions have a higher  
495 tendency to be affected closer in time by tau along a specific network path  
496 cascading from the medial temporal lobe. Future models may be able to  
497 improve results by incorporating region-specific vulnerability factors, direc-  
498 tional flow and amyloid dynamics, though contributing such information in  
499 a parsimonious way presents a difficult challenge.

## 500 6. References

- 501 [1] V. L. Villemagne, V. Doré, S. C. Burnham, C. L. Masters, C. C. Rowe, Imaging tau  
502 and amyloid- $\beta$  proteinopathies in Alzheimer disease and other conditions, *Nature*  
503 *Reviews Neurology* 14 (2018) 225–236.

- 504 [2] V. L. Villemagne, S. Burnham, P. Bourgeat, B. Brown, K. A. Ellis, O. Salvado,  
505 C. Szoek, S. L. Macaulay, R. Martins, P. Maruff, D. Ames, C. C. Rowe, C. L.  
506 Masters, Amyloid  $\beta$  deposition, neurodegeneration, and cognitive decline in sporadic  
507 Alzheimer's disease: A prospective cohort study, *The Lancet Neurology* 12 (2013)  
508 357–367.
- 509 [3] T. Hedden, H. Oh, A. P. Younger, T. A. Patel, Meta-analysis of amyloid-cognition  
510 relations in cognitively normal older adults, *Neurology* 80 (2013) 1341–1348.
- 511 [4] M. C. Donohue, R. A. Sperling, R. Petersen, C. K. Sun, M. Weiner, P. S. Aisen,  
512 Association between elevated brain amyloid and subsequent cognitive decline among  
513 cognitively normal persons, *JAMA - Journal of the American Medical Association*  
514 317 (2017) 2305–2316.
- 515 [5] S. Palmqvist, M. Schöll, O. Strandberg, N. Mattsson, E. Stomrud, H. Zetterberg,  
516 K. Blennow, S. Landau, W. Jagust, O. Hansson, Earliest accumulation of  $\beta$ -amyloid  
517 occurs within the default-mode network and concurrently affects brain connectivity,  
518 *Nature Communications* 8 (2017) 1214.
- 519 [6] B. A. Gordon, A. McCullough, S. Mishra, T. M. Blazey, Y. Su, J. Christensen,  
520 A. Dincer, K. Jackson, R. C. Hornbeck, J. C. Morris, B. M. Ances, T. L. Benzinger,  
521 Cross-sectional and longitudinal atrophy is preferentially associated with tau rather  
522 than amyloid  $\beta$  positron emission tomography pathology, *Alzheimer's and Dementia:  
523 Diagnosis, Assessment and Disease Monitoring* 10 (2018) 245–252.
- 524 [7] C. Xia, S. J. Makaretz, C. Caso, S. McGinnis, S. N. Gomperts, J. Sepulcre, T. Gomez-  
525 Isla, B. T. Hyman, A. Schultz, N. Vasdev, K. A. Johnson, B. C. Dickerson, Association  
526 of In Vivo [ $^{18}$ F]AV-1451 Tau PET Imaging Results With Cortical At-  
527 rophy and Symptoms in Typical and Atypical Alzheimer Disease, *JAMA Neurology*  
528 74 (2017) 427.
- 529 [8] A. Bejanin, D. R. Schonhaut, R. La Joie, J. H. Kramer, S. L. Baker, N. Sosa,  
530 N. Ayakta, A. Cantwell, M. Janabi, M. Lauriola, J. P. O'Neil, M. L. Gorno-Tempini,  
531 Z. A. Miller, H. J. Rosen, B. L. Miller, W. J. Jagust, G. D. Rabinovici, Tau pathol-  
532 ogy and neurodegeneration contribute to cognitive impairment in Alzheimers disease,  
533 *Brain* 140 (2017) 3286–3300.
- 534 [9] J. F. Crary, J. Q. Trojanowski, J. A. Schneider, J. F. Abisambra, E. L. Abner,  
535 I. Alafuzoff, S. E. Arnold, J. Attems, T. G. Beach, E. H. Bigio, N. J. Cairns, D. W.  
536 Dickson, M. Gearing, L. T. Grinberg, P. R. Hof, B. T. Hyman, K. Jellinger, G. A.  
537 Jicha, G. G. Kovacs, D. S. Knopman, J. Kofler, W. A. Kukull, I. R. Mackenzie,  
538 E. Masliah, A. McKee, T. J. Montine, M. E. Murray, J. H. Neltner, I. Santa-Maria,  
539 W. W. Seeley, A. Serrano-Pozo, M. L. Shelanski, T. Stein, M. Takao, D. R. Thal,  
540 J. B. Toledo, J. C. Troncoso, J. P. Vonsattel, C. L. White, T. Wisniewski, R. L. Wolt-  
541 jer, M. Yamada, P. T. Nelson, Primary age-related tauopathy (PART): a common  
542 pathology associated with human aging, *Acta Neuropathologica* 128 (2014) 755–766.

- 543 [10] H. Braak, K. Del Tredici, The preclinical phase of the pathological process underlying  
544 sporadic Alzheimer's disease, *Brain* 138 (2015) 2814–2833.
- 545 [11] T. M. Harrison, R. La Joie, A. Maass, S. L. Baker, K. Swinnerton, L. Fenton, T. J.  
546 Mellinger, L. Edwards, J. Pham, B. L. Miller, G. D. Rabinovici, W. J. Jagust, Long-  
547 gitudinal tau accumulation and atrophy in aging and Alzheimers disease, *Annals of*  
548 *Neurology* (2018) 229–240.
- 549 [12] Z. He, J. L. Guo, J. D. McBride, S. Narasimhan, H. Kim, L. Changolkar, B. Zhang,  
550 R. J. Gathagan, C. Yue, C. Dengler, A. Stieber, M. Nitla, D. A. Coulter, T. Abel,  
551 K. R. Brunden, J. Q. Trojanowski, V. M.-y. Lee, Amyloid- $\beta$  plaques enhance  
552 Alzheimer's brain tau-seeded pathologies by facilitating neuritic plaque tau aggre-  
553 gation, *Nature Medicine* 24 (2018) 29–38.
- 554 [13] R. E. Bennett, S. L. DeVos, S. Dujardin, B. Corjuc, R. Gor, J. Gonzalez, A. D. Roe,  
555 M. P. Frosch, R. Pitstick, G. A. Carlson, B. T. Hyman, Enhanced Tau Aggregation  
556 in the Presence of Amyloid  $\beta$ , *American Journal of Pathology* 187 (2017) 1601–1612.
- 557 [14] E. E. Congdon, E. M. Sigurdsson, Tau-targeting therapies for Alzheimer disease,  
558 *Nature Reviews Neurology* 14 (2018) 399–415.
- 559 [15] H. Braak, E. Braak, Neuropathological staging of Alzheimer-related changes., *Acta*  
560 *neuropathologica* 82 (1991) 239–59.
- 561 [16] H. Cho, J. Y. Choi, M. S. Hwang, Y. J. Kim, H. M. Lee, H. S. Lee, J. H. Lee, Y. H.  
562 Ryu, M. S. Lee, C. H. Lyoo, In vivo cortical spreading pattern of tau and amyloid  
563 in the Alzheimer disease spectrum, *Annals of Neurology* 80 (2016) 247–258.
- 564 [17] H. Cho, H. S. Lee, J. Y. Choi, J. H. Lee, Y. H. Ryu, M. S. Lee, C. H. Lyoo, Predicted  
565 sequence of cortical tau and amyloid- $\beta$  deposition in Alzheimer disease spectrum,  
566 *Neurobiology of Aging* 68 (2018) 76–84.
- 567 [18] M. Goedert, D. S. Eisenberg, R. A. Crowther, Propagation of Tau Aggregates and  
568 Neurodegeneration, *Annual Review of Neuroscience* 40 (2017) 189–210.
- 569 [19] B. Frost, M. I. Diamond, Prion-like mechanisms in neurodegenerative diseases, *Nature*  
570 *Reviews Neuroscience* 11 (2010) 155–159.
- 571 [20] A. De Calignon, M. Polydoro, M. Su??rez-Calvet, C. William, D. H. Adamowicz,  
572 K. J. Kopeikina, R. Pitstick, N. Sahara, K. H. Ashe, G. A. Carlson, T. L. Spires-  
573 Jones, B. T. Hyman, Propagation of Tau Pathology in a Model of Early Alzheimer's  
574 Disease, *Neuron* 73 (2012) 685–697.
- 575 [21] L. Liu, V. Drouet, J. W. Wu, M. P. Witter, S. A. Small, C. Clelland, K. Duff, Trans-  
576 synaptic spread of tau pathology in vivo, *PLoS ONE* 7 (2012) 1–9.

- 577 [22] M. Iba, J. L. Guo, J. D. McBride, B. Zhang, J. Q. Trojanowski, V. M.-Y. Lee,  
578 Synthetic Tau Fibrils Mediate Transmission of Neurofibrillary Tangles in a Transgenic  
579 Mouse Model of Alzheimer’s-Like Tauopathy, *Journal of Neuroscience* 33 (2013)  
580 1024–1037.
- 581 [23] F. Clavaguera, H. Akatsu, G. Fraser, R. A. Crowther, S. Frank, J. Hench, A. Probst,  
582 D. T. Winkler, J. Reichwald, M. Staufenbiel, B. Ghetti, M. Goedert, M. Tolnay,  
583 Brain homogenates from human tauopathies induce tau inclusions in mouse brain,  
584 *Proceedings of the National Academy of Sciences* 110 (2013) 9535–9540.
- 585 [24] S. L. DeVos, B. T. Corjuc, D. H. Oakley, C. K. Nobuhara, R. N. Bannan, A. Chase,  
586 C. Commins, J. A. Gonzalez, P. M. Dooley, M. P. Frosch, B. T. Hyman, Synaptic  
587 tau seeding precedes tau pathology in human Alzheimer’s disease brain, *Frontiers in*  
588 *Neuroscience* 12 (2018) 1–15.
- 589 [25] J. Brettschneider, K. Del Tredici, V. M. Lee, J. Q. Trojanowski, Spreading of pathol-  
590 ogy in neurodegenerative diseases: A focus on human studies, *Nature Reviews Neu-*  
591 *roscience* 16 (2015) 109–120.
- 592 [26] J. Y. Choi, H. Cho, S. J. Ahn, J. H. Lee, Y. H. Ryu, M. S. Lee, C. H. Lyoo, Off-  
593 Target 18 F-AV-1451 Binding in the Basal Ganglia Correlates with Age-Related Iron  
594 Accumulation, *Journal of Nuclear Medicine* 59 (2018) 117–120.
- 595 [27] L. Lemoine, A. Leuzy, K. Chiotis, E. Rodriguez-Vieitez, A. Nordberg, Tau positron  
596 emission tomography imaging in tauopathies: The added hurdle of off-target binding,  
597 *Alzheimer’s and Dementia: Diagnosis, Assessment and Disease Monitoring* 10 (2018)  
598 232–236.
- 599 [28] M. Marquié, M. Siao Tick Chong, A. Antón-Fernández, E. E. Verwer, N. Sáez-  
600 Calveras, A. C. Meltzer, P. Ramanan, A. C. Amaral, J. Gonzalez, M. D. Normandin,  
601 M. P. Frosch, T. Gómez-Isla, [F-18]-AV-1451 binding correlates with postmortem  
602 neurofibrillary tangle Braak staging, *Acta Neuropathologica* 134 (2017) 619–628.
- 603 [29] S. N. Lockhart, N. Ayakta, J. R. Winer, R. La Joie, G. D. Rabinovici, W. J. Jagust,  
604 Elevated (18)F-AV-1451 PET tracer uptake detected in incidental imaging findings.,  
605 *Neurology* 88 (2017) 1095–1097.
- 606 [30] D. T. Jones, J. Graff-Radford, V. J. Lowe, H. J. Wiste, J. L. Gunter, M. L. Senjem,  
607 H. Botha, K. Kantarci, B. F. Boeve, D. S. Knopman, R. C. Petersen, C. R. Jack, Tau,  
608 Amyloid, and Cascading Network Failure across the Alzheimers disease Spectrum,  
609 *Cortex* (2017) 1–17.
- 610 [31] J. W. Vogel, N. Mattsson, Y. Iturria-Medina, O. T. Strandberg, M. Schöll,  
611 C. Dansereau, S. Villeneuve, W. M. van der Flier, P. Scheltens, P. Bellec, A. C.  
612 Evans, O. Hansson, R. Ossenkoppele, Data-driven approaches for tau-PET imaging  
613 biomarkers in Alzheimer’s disease, *Human Brain Mapping* 40 (2019) 638–651.



- 614 [32] T. E. Cope, T. Rittman, R. J. Borchert, P. S. Jones, D. Vatansever, K. Allinson,  
615 L. Passamonti, P. Vazquez Rodriguez, W. R. Bevan-Jones, J. T. O'Brien, J. B. Rowe,  
616 Tau burden and the functional connectome in Alzheimer's disease and progressive  
617 supranuclear palsy, *Brain* 141 (2018) 550–567.
- 618 [33] N. Franzmeier, A. Rubinski, J. Neitzel, Y. Kim, A. Damm, D. L. Na, H. J. Kim,  
619 C. H. Lyoo, H. Cho, S. Finsterwalder, M. Duering, S. W. Seo, M. Ewers, Functional  
620 connectivity associated with tau levels in ageing, Alzheimers, and small vessel disease,  
621 *Brain* (2019) 1–15.
- 622 [34] R. Ossenkuppele, L. Iaccarino, D. R. Schonhaut, J. A. Brown, R. La Joie, J. P.  
623 O'Neil, M. Janabi, S. L. Baker, J. H. Kramer, M.-L. Gorno-Tempini, B. L. Miller,  
624 H. J. Rosen, W. W. Seeley, W. J. Jagust, G. D. Rabinovici, Tau covariance patterns  
625 in Alzheimer's disease patients match intrinsic connectivity networks in the healthy  
626 brain, *NeuroImage: Clinical* 23 (2019) 101848.
- 627 [35] S. Palmqvist, H. Zetterberg, N. Mattsson, P. Johansson, L. Minthon, K. Blennow,  
628 M. Olsson, O. Hansson, Detailed comparison of amyloid PET and CSF biomarkers  
629 for identifying early Alzheimer disease, *Neurology* 85 (2015) 1240–1249.
- 630 [36] O. Hansson, M. J. Grothe, T. O. Strandberg, T. Ohlsson, Tau Pathology Distribution  
631 in Alzheimer's disease Corresponds Differentially to Cognition-Relevant Functional  
632 Brain Networks 11 (2017).
- 633 [37] R. S. Desikan, F. Ségonne, B. Fischl, B. T. Quinn, B. C. Dickerson, D. Blacker, R. L.  
634 Buckner, A. M. Dale, R. P. Maguire, B. T. Hyman, M. S. Albert, R. J. Killiany, An  
635 automated labeling system for subdividing the human cerebral cortex on MRI scans  
636 into gyral based regions of interest, *NeuroImage* 31 (2006) 968–980.
- 637 [38] M. J. Grothe, H. Barthel, J. Sepulcre, M. Dyrba, O. Sabri, S. J. Teipel, In vivo  
638 staging of regional amyloid deposition, *Neurology* 89 (2017) 2031–2038.
- 639 [39] S. Palmqvist, H. Zetterberg, K. Blennow, S. Vestberg, U. Andreasson, D. J. Brooks,  
640 R. Owenius, D. Hägerström, P. Wollmer, L. Minthon, O. Hansson, Accuracy of  
641 Brain Amyloid Detection in Clinical Practice Using Cerebrospinal Fluid  $\beta$ -Amyloid  
642 42, *JAMA Neurology* 71 (2014) 1282.
- 643 [40] P. Bellec, COBRE preprocessed with NIAK 0.17 - lightweight release, 2016.
- 644 [41] Y. Iturria-Medina, E. J. Canales-Rodríguez, L. Melie-García, P. A. Valdés-Hernández,  
645 E. Martínez-Montes, Y. Alemán-Gómez, J. M. Sánchez-Bornot, Characterizing brain  
646 anatomical connections using diffusion weighted MRI and graph theory, *NeuroImage*  
647 36 (2007) 645–660.
- 648 [42] Y. Iturria-Medina, F. M. Carbonell, R. C. Sotero, F. Chouinard-Decorte, A. C. Evans,  
649 Multifactorial causal model of brain (dis)organization and therapeutic intervention:  
650 Application to Alzheimer's disease, *NeuroImage* 152 (2017) 60–77.

- 651 [43] Y. Iturria-Medina, R. C. Sotero, P. J. Toussaint, A. C. Evans, Epidemic Spread-  
652 ing Model to Characterize Misfolded Proteins Propagation in Aging and Associated  
653 Neurodegenerative Disorders, *PLoS Computational Biology* 10 (2014).
- 654 [44] M. Schöll, S. N. Lockhart, D. R. Schonhaut, J. P. O’Neil, M. Janabi, R. Ossenkoppele,  
655 S. L. Baker, J. W. Vogel, J. Faria, H. D. Schwimmer, G. D. Rabinovici, W. J. Jagust,  
656 PET Imaging of Tau Deposition in the Aging Human Brain, *Neuron* 89 (2016) 971–  
657 982.
- 658 [45] Y. Iturria-Medina, A. C. Evans, On the central role of brain connectivity in neurode-  
659 generative disease progression., *Frontiers in aging neuroscience* 7 (2015) 90.
- 660 [46] W. W. Seeley, R. K. Crawford, J. Zhou, B. L. Miller, M. D. Greicius, Neurode-  
661 generative Diseases Target Large-Scale Human Brain Networks, *Neuron* 62 (2009)  
662 42–52.
- 663 [47] J. Zhou, E. D. Gennatas, J. H. Kramer, B. L. Miller, W. W. Seeley, Predicting  
664 Regional Neurodegeneration from the Healthy Brain Functional Connectome, *Neuron*  
665 73 (2012) 1216–1227.
- 666 [48] N. A. Crossley, A. Mechelli, J. Scott, F. Carletti, P. T. Fox, P. McGuire, E. T.  
667 Bullmore, The hubs of the human connectome are generally implicated in the anatomy  
668 of brain disorders, *Brain* 137 (2014) 2382–2395.
- 669 [49] A. Raj, A. Kuceyeski, M. Weiner, A Network Diffusion Model of Disease Progression  
670 in Dementia, *Neuron* 73 (2012) 1204–1215.
- 671 [50] Y.-Q. Zheng, Y. Zhang, Y. H. C. Yau, Y. Zeighami, K. Larcher, B. Misić, A. Dagher,  
672 Connectome architecture, gene expression and functional co-activation shape the  
673 propagation of misfolded proteins in neurodegenerative disease, *bioRxiv* (2018)  
674 449199.
- 675 [51] J. Torok, P. D. Maia, F. Powell, S. Pandya, A. Raj, A method for inferring regional  
676 origins of neurodegeneration, *Brain* 141 (2018) 863–876.
- 677 [52] K. S. Jefferson-George, D. A. Wolk, E. B. Lee, C. T. McMillan, Cognitive decline  
678 associated with pathological burden in primary age-related tauopathy, *Alzheimer’s*  
679 *and Dementia* 13 (2017) 1048–1053.
- 680 [53] H. Braak, K. Del Tredici, Are cases with tau pathology occurring in the absence of  
681  $A\beta$  deposits part of the AD-related pathological process?, *Acta Neuropathologica*  
682 128 (2014) 767–772.
- 683 [54] M. J. Grothe, J. Sepulcre, G. Gonzalez-Escamilla, I. Jelicstratova, M. Schöll, O. Hans-  
684 son, S. J. Teipel, Molecular properties underlying regional vulnerability to Alzheimers  
685 disease pathology, *Brain* (2018) 2755–2771.

- 686 [55] M. Scherr, L. Utz, M. Tahmasian, L. Pasquini, M. J. Grothe, J. P. Rauschecker,  
687 T. Grimmer, A. Drzezga, C. Sorg, V. Riedl, Effective connectivity in the default mode  
688 network is distinctively disrupted in Alzheimer's disease-A simultaneous resting-state  
689 FDG-PET/fMRI study, *Human Brain Mapping* (2019) 1–10.
- 690 [56] C. R. Jack, H. J. Wiste, S. D. Weigand, T. M. Therneau, V. J. Lowe, D. S. Knopman,  
691 J. L. Gunter, M. L. Senjem, D. T. Jones, K. Kantarci, M. M. Machulda, M. M. Mielke,  
692 R. O. Roberts, P. Vemuri, D. A. Reyes, R. C. Petersen, Defining imaging biomarker  
693 cut points for brain aging and Alzheimer's disease, *Alzheimer's and Dementia* 13  
694 (2017) 205–216.
- 695 [57] J. P. Aggleton, A. Pralus, A. J. D. Nelson, M. Hornberger, Thalamic pathology and  
696 memory loss in early Alzheimers disease: moving the focus from the medial temporal  
697 lobe to Papez circuit, *Brain* 139 (2016) 1877–1890.
